# Supplementary material
Source: Copernicus journal article supplement (doi:10.5194/egusphere-2026-3273)
Supplement: Supplementary file 1 [file egusphere-2026-3273-supplement.pdf]

**Table** Main site characteristics, and studied periods of flux sites used in this analysis. All the data gathered from [www.fluxdata.org](http://www.fluxdata.org) and citations following Pastorello et al. (2020).

| Site name | Lon <sup>1</sup> | Lat <sup>2</sup> | Alt <sup>3</sup> | Year start | Year end | Veg <sup>4</sup> | Ref <sup>5</sup>              |
|-----------|------------------|------------------|------------------|------------|----------|------------------|-------------------------------|
| AR-SLu    | -66.4598         | -33.4648         | 504              | 2009       | 2011     | MF               | Garcia et al. (2016)          |
| AR-Vir    | -56.1886         | -28.2395         | 100              | 2010       | 2012     | ENF              | Posse and Cristiano (2016)    |
| AT-Neu    | 11.3175          | 47.11667         | 1022             | 2002       | 2012     | GRA              | Wohlfahrt and Hörtnagl (2016) |
| AU-ASM    | 133.249          | -22.283          | 607              | 2010       | 2014     | SAV              | Cleverly and Eamus (2016)     |
| AU-Ade    | 131.1178         | -13.0769         | 77               | 2007       | 2009     | WSA              | Beringer and Hutley (2016)    |
| AU-Cpr    | 140.5891         | -34.0021         | 62               | 2010       | 2014     | SAV              | Meyer et al. (2016)           |
| AU-Cum    | 150.7236         | -33.61518        | 34               | 2012       | 2014     | EBF              | Pendall and Griebel (2016)    |
| AU-DaP    | 131.3181         | -14.0633         | 73               | 2007       | 2013     | GRA              | Beringer and Hutley (2016)    |
| AU-DaS    | 131.3881         | -14.1593         | 77               | 2008       | 2014     | SAV              | Beringer and Hutley (2016)    |
| AU-Dry    | 132.3706         | -15.2588         | 172              | 2008       | 2014     | SAV              | Beringer and Hutley (2016)    |
| AU-Emr    | 148.4746         | -23.8587         | 181              | 2011       | 2013     | GRA              | Schroder and Feitz (2016)     |
| AU-GWW    | 120.6541         | -30.1913         | 448              | 2013       | 2014     | SAV              | Macfarlane and Wiehl (2016)   |
| AU-Gin    | 115.7138         | -31.3764         | 50               | 2011       | 2014     | WSA              | Macfarlane et al. (2016)      |
| AU-How    | 131.1523         | -12.4943         | 38               | 2001       | 2014     | WSA              | Beringer and Hutley (2016)    |
| AU-Lox    | 140.6551         | -34.4704         | 47               | 2008       | 2009     | DBF              | Ewenz and Grigson (2016)      |
| AU-RDF    | 132.4776         | -14.5636         | 187              | 2011       | 2013     | WSA              | Beringer and Hutley (2016)    |
| AU-Rig    | 145.5759         | -36.6499         | 152              | 2011       | 2014     | GRA              | Beringer et al. (2016a)       |
| AU-Stp    | 133.3502         | -17.1507         | 228              | 2008       | 2014     | GRA              | Beringer and Hutley (2016)    |
| AU-Tum    | 148.1517         | -35.6566         | 1246             | 2001       | 2014     | EBF              | Woodgate and Leuning (2016)   |
| AU-Wac    | 145.1878         | -37.4259         | 738              | 2005       | 2008     | EBF              | Beringer and U (2016)         |
| AU-Whr    | 145.0294         | -36.6732         | 151              | 2011       | 2014     | EBF              | Beringer et al. (2016b)       |
| AU-Wom    | 144.0944         | -37.4222         | 711              | 2010       | 2014     | EBF              | Arndt and Griebel (2016)      |
| BE-Bra    | 4.51984          | 51.30761         | 20               | 1999       | 2014     | MF               | Neiryneck et al. (2016)       |
| BE-Vie    | 5.99812          | 50.30493         | 486              | 1996       | 2014     | MF               | De Ligne et al. (2016)        |
| BR-Sa1    | -54.95889        | -2.85667         | 196              | 2002       | 2011     | EBF              | Saleska (2016)                |
| BR-Sa3    | -54.97144        | -3.01803         | 182              | 2000       | 2004     | EBF              | Goulden (2016a)               |
| CA-Gro    | -82.1556         | 48.2167          | 350              | 2003       | 2014     | MF               | McCaughey (2016)              |
| CA-NS1    | -98.48389        | 55.87917         | 264              | 2002       | 2005     | ENF              | Goulden (2016b)               |
| CA-NS2    | -98.52472        | 55.90583         | 267              | 2001       | 2005     | ENF              | Goulden (2016c)               |
| CA-NS3    | -98.38222        | 55.91167         | 251              | 2001       | 2005     | ENF              | Goulden (2016d)               |
| CA-NS4    | -98.38065        | 55.91437         | 251              | 2002       | 2005     | ENF              | Goulden (2016e)               |
| CA-NS5    | -98.485          | 55.86306         | 263              | 2001       | 2005     | ENF              | Goulden (2016f)               |
| CA-NS6    | -98.96444        | 55.91667         | 263              | 2001       | 2005     | OSH              | Goulden (2016g)               |
| CA-NS7    | -99.94833        | 56.63583         | 270              | 2002       | 2005     | OSH              | Goulden (2016h)               |
| CA-Oas    | -106.1978        | 53.62889         | 589              | 1996       | 2010     | DBF              | Black (2016a)                 |
| CA-Obs    | -105.1178        | 53.98717         | 593              | 1999       | 2010     | ENF              | Black (2016b)                 |
| CA-Qfo    | -74.34206        | 49.6925          | 385              | 2003       | 2010     | ENF              | Margolis (2016)               |
| CA-SF1    | -105.8176        | 54.48503         | 570              | 2003       | 2006     | ENF              | Amiro (2016a)                 |
| CA-SF2    | -105.8775        | 54.25392         | 511              | 2001       | 2005     | ENF              | Amiro (2016b)                 |
| CA-SF3    | -106.0053        | 54.09156         | 543              | 2002       | 2006     | OSH              | Amiro (2016c)                 |
| CA-TP1    | -80.55952        | 42.66094         | 201              | 2003       | 2014     | ENF              | Arain (2016a)                 |
| CA-TP2    | -80.45878        | 42.77442         | 234              | 2003       | 2007     | ENF              | Arain (2016b)                 |
| CA-TP3    | -80.34831        | 42.70681         | 229              | 2003       | 2014     | ENF              | Arain (2016c)                 |
| CA-TP4    | -80.35738        | 42.71016         | 230              | 2002       | 2014     | ENF              | Arain (2016d)                 |
| CA-TPD    | -80.55773        | 42.63533         | 210              | 2012       | 2014     | DBF              | Arain (2016e)                 |
| CG-Tch    | 11.65642         | -4.28917         | 80               | 2006       | 2009     | SAV              | Nouvellon (2016)              |

| Site name | Lon <sup>1</sup> | Lat <sup>2</sup> | Alt <sup>3</sup> | Year start | Year end | Veg <sup>4</sup> | Ref <sup>5</sup>                 |
|-----------|------------------|------------------|------------------|------------|----------|------------------|----------------------------------|
| CH-Cha    | 8.41044          | 47.21022         | 395              | 2005       | 2014     | GRA              | Hörtnagl et al. (2016a)          |
| CH-Dav    | 9.85591          | 46.81533         | 1613             | 1997       | 2014     | ENF              | Hörtnagl et al. (2016b)          |
| CH-Fru    | 8.53778          | 47.11583         | 972              | 2005       | 2014     | GRA              | Hörtnagl et al. (2016c)          |
| CH-Lae    | 8.36439          | 47.47833         | 708              | 2004       | 2014     | MF               | Hörtnagl et al. (2016d)          |
| CH-Oe1    | 7.73194          | 47.28583         | 454              | 2002       | 2014     | GRA              | Ammann (2016)                    |
| CN-Cha    | 128.0958         | 42.4025          | 754              | 2003       | 2005     | MF               | Zhang and Han (2016)             |
| CN-Cng    | 123.5092         | 44.5934          | 141              | 2007       | 2010     | GRA              | Dong (2016)                      |
| CN-Dan    | 91.0664          | 30.4978          | 4321             | 2004       | 2005     | GRA              | Shi and He (2016)                |
| CN-Din    | 112.5361         | 23.1733          | 320              | 2003       | 2005     | EBF              | Zhou and Yan (2016)              |
| CN-Du2    | 116.2836         | 42.0467          | 1321             | 2007       | 2008     | GRA              | Chen (2016e)                     |
| CN-HaM    | 101.18           | 37.37            | 3997             | 2002       | 2004     | GRA              | Tang and Du (2016)               |
| CN-Qia    | 115.0581         | 26.7414          | 122              | 2003       | 2005     | ENF              | Wang and Fu (2016)               |
| CZ-BK1    | 18.53688         | 49.50208         | 853              | 2004       | 2014     | ENF              | Sigut et al. (2016a)             |
| CZ-BK2    | 18.54285         | 49.49443         | 866              | 2006       | 2012     | GRA              | Sigut et al. (2016b)             |
| DE-Gri    | 13.51253         | 50.94947         | 388              | 2004       | 2014     | GRA              | Bernhofer et al. (2016a)         |
| DE-Hai    | 10.45217         | 51.07921         | 455              | 2000       | 2012     | DBF              | Knohl et al. (2016a)             |
| DE-Lkb    | 13.30467         | 49.09962         | 1245             | 2009       | 2013     | ENF              | Lindauer et al. (2016)           |
| DE-Lnf    | 10.3678          | 51.32822         | 474              | 2002       | 2012     | DBF              | Knohl et al. (2016b)             |
| DE-Obe    | 13.72129         | 50.78666         | 743              | 2008       | 2014     | ENF              | Bernhofer et al. (2016b)         |
| DE-Tha    | 13.56515         | 50.96256         | 394              | 1996       | 2014     | ENF              | Bernhofer et al. (2016c)         |
| DK-Eng    | 12.19175         | 55.69053         | 16               | 2005       | 2008     | GRA              | Pilegaard and Ibrom (2016)       |
| DK-Sor    | 11.64464         | 55.48587         | 44               | 1996       | 2014     | DBF              | Ibrom and Pilegaard (2016)       |
| ES-Amo    | -2.25232         | 36.83361         | 54               | 2007       | 2012     | OSH              | Poveda et al. (2016)             |
| ES-LJu    | -2.75212         | 36.92659         | 1561             | 2004       | 2013     | OSH              | Cañete et al. (2016)             |
| ES-LgS    | -2.96583         | 37.09794         | 2265             | 2007       | 2009     | OSH              | Reverter and Kowalski (2016)     |
| FI-Hyy    | 24.29477         | 61.84741         | 185              | 1996       | 2014     | ENF              | Mammarella et al. (2016)         |
| FI-Let    | 23.95952         | 60.64183         | 107              | 2009       | 2012     | ENF              | Lohila et al. (2016)             |
| FI-Sod    | 26.63859         | 67.36239         | 188              | 2001       | 2014     | ENF              | Aurela et al. (2016)             |
| FR-Fon    | 2.7801           | 48.47636         | 98               | 2005       | 2014     | DBF              | Berveiller et al. (2016)         |
| FR-LBr    | -0.7693          | 44.71711         | 67               | 1996       | 2008     | ENF              | Berbigier and Loustau (2016)     |
| FR-Pue    | 3.5957           | 43.7413          | 268              | 2000       | 2014     | EBF              | Ourcival (2016)                  |
| GF-Guy    | -52.92486        | 5.27877          | 50               | 2004       | 2014     | EBF              | Bonal and Burban (2016)          |
| GH-Ank    | -2.69421         | 5.26854          | 102              | 2011       | 2014     | EBF              | Valentini et al. (2016a)         |
| GL-ZaH    | -20.5503         | 74.47328         | 52               | 2000       | 2014     | GRA              | Lund and Abermann (2016)         |
| IT-CA1    | 12.02656         | 42.38041         | 204              | 2011       | 2014     | DBF              | Sabbatini and Papale (2016)      |
| IT-CA3    | 12.0222          | 42.38            | 195              | 2011       | 2014     | DBF              | Sabbatini and Papale (2016)      |
| IT-Col    | 13.58814         | 41.84936         | 1563             | 1996       | 2014     | DBF              | Matteucci (2016)                 |
| IT-Cp2    | 12.35729         | 41.70427         | 10               | 2012       | 2014     | EBF              | Fares and Conte (2016)           |
| IT-Cpz    | 12.37611         | 41.70525         | 15               | 2000       | 2008     | EBF              | Valentini et al. (2016b)         |
| IT-Isp    | 8.63358          | 45.81264         | 222              | 2013       | 2014     | DBF              | Gruening and Pokorska (2016)     |
| IT-La2    | 11.2853          | 45.9542          | 1347             | 2000       | 2002     | ENF              | Cescatti and Gianelle (2016)     |
| IT-Lav    | 11.28132         | 45.9562          | 1360             | 2003       | 2014     | ENF              | Gianelle and Sottocornola (2016) |
| IT-MBo    | 11.04583         | 46.01468         | 1558             | 2003       | 2013     | GRA              | Gianelle and Marcolla (2016)     |
| IT-Noe    | 8.15169          | 40.60618         | 31               | 2004       | 2014     | CSH              | Spano et al. (2016)              |
| IT-PT1    | 9.06104          | 45.20087         | 63               | 2002       | 2004     | DBF              | Manca and Goded (2016)           |
| IT-Ren    | 11.43369         | 46.58686         | 1784             | 1999       | 2013     | ENF              | Montagnani and Minerbi (2016)    |
| IT-Ro1    | 11.93001         | 42.40812         | 165              | 2000       | 2008     | DBF              | Valentini et al. (2016c)         |
| IT-Ro2    | 11.92093         | 42.39026         | 160              | 2002       | 2012     | DBF              | Papale et al. (2016)             |
| IT-SR2    | 10.29091         | 43.73202         | 11               | 2013       | 2014     | ENF              | Gruening and Pokorska (2016)     |

| Site name | Lon <sup>1</sup> | Lat <sup>2</sup> | Alt <sup>3</sup> | Year start | Year end | Veg <sup>4</sup> | Ref <sup>5</sup>                |
|-----------|------------------|------------------|------------------|------------|----------|------------------|---------------------------------|
| IT-SRo    | 10.28444         | 43.72786         | 11               | 1999       | 2012     | ENF              | Gruening et al. (2016)          |
| IT-Tor    | 7.57806          | 45.84444         | 2193             | 2008       | 2014     | GRA              | Cremonese and Migliavaca (2016) |
| JP-MBF    | 142.3186         | 44.3869          | 536              | 2004       | 2005     | DBF              | Kotani (2016a)                  |
| JP-SMF    | 137.0788         | 35.2617          | 182              | 2002       | 2006     | MF               | Kotani (2016b)                  |
| NL-Hor    | 5.0713           | 52.24035         | -1               | 2004       | 2011     | GRA              | Dolman et al. (2016a)           |
| NL-Loo    | 5.74356          | 52.16658         | 33               | 1996       | 2014     | ENF              | Moors and Elbers (2016)         |
| PA-SPn    | -79.6346         | 9.31814          | 84               | 2007       | 2009     | DBF              | Wolf and Buchmann (2016)        |
| PA-SPs    | -79.63143        | 9.31378          | 79               | 2007       | 2009     | GRA              | Wolf and Buchmann (2016)        |
| RU-Cok    | 147.4943         | 70.82914         | 5                | 2003       | 2013     | OSH              | Dolman et al. (2016b)           |
| RU-Fyo    | 32.92208         | 56.46153         | 274              | 1998       | 2014     | ENF              | Varlagin and Vygodskaya (2016)  |
| RU-Ha1    | 90.00215         | 54.72517         | 426              | 2002       | 2004     | GRA              | Belelli and Valentini (2016)    |
| SD-Dem    | 30.4783          | 13.2829          | 535              | 2005       | 2009     | SAV              | Ardö and ElKhidir (2016)        |
| SN-Dhr    | -15.43222        | 15.40278         | 42               | 2010       | 2013     | SAV              | Tagesson and Fensholt (2016)    |
| US-AR1    | -99.42           | 36.4267          | 612              | 2009       | 2012     | GRA              | Billesbach and Torn (2016)      |
| US-AR2    | -99.5975         | 36.6358          | 651              | 2009       | 2012     | GRA              | Billesbach and Torn (2016)      |
| US-ARb    | -98.0402         | 35.5497          | 423              | 2005       | 2006     | GRA              | Torn (2016a)                    |
| US-ARc    | -98.04           | 35.54649         | 423              | 2005       | 2006     | GRA              | Torn (2016b)                    |
| US-Blo    | -120.6328        | 38.8953          | 1335             | 1997       | 2007     | ENF              | Goldstein (2016)                |
| US-Cop    | -109.39          | 38.09            | 1913             | 2001       | 2007     | GRA              | Bowling (2016)                  |
| US-GBT    | -106.2397        | 41.36579         | 3154             | 2001       | 2003     | ENF              | Massman (2016a)                 |
| US-GLE    | -106.2399        | 41.36653         | 3154             | 2005       | 2014     | ENF              | Massman (2016b)                 |
| US-Goo    | -89.8735         | 34.2547          | 97               | 2002       | 2006     | GRA              | Meyers (2016a)                  |
| US-Ha1    | -72.1715         | 42.5378          | 355              | 1991       | 2012     | DBF              | Munger (2016)                   |
| US-IB2    | -88.24103        | 41.84062         | 226              | 2004       | 2011     | GRA              | Matamala (2016)                 |
| US-KS2    | -80.6715         | 28.6086          | 5                | 2003       | 2006     | CSH              | Drake and Hinkle (2016)         |
| US-LWW    | -97.9789         | 34.9604          | 363              | 1997       | 1998     | GRA              | Meyers (2016b)                  |
| US-MMS    | -86.4131         | 39.3232          | 277              | 1999       | 2014     | DBF              | Novick and Phillips (2016)      |
| US-Me1    | -121.5           | 44.5794          | 874              | 2004       | 2005     | ENF              | Law (2016a)                     |
| US-Me2    | -121.5574        | 44.4523          | 1270             | 2002       | 2014     | ENF              | Law (2016b)                     |
| US-Me3    | -121.6078        | 44.3154          | 1010             | 2004       | 2009     | ENF              | Law (2016c)                     |
| US-Me4    | -121.6224        | 44.4992          | 956              | 1996       | 2000     | ENF              | Law (2016d)                     |
| US-Me5    | -121.5668        | 44.43719         | 1186             | 2000       | 2002     | ENF              | Law (2016e)                     |
| US-Me6    | -121.6078        | 44.32328         | 1001             | 2010       | 2014     | ENF              | Law (2016f)                     |
| US-NR1    | -105.5464        | 40.0329          | 3056             | 1999       | 2014     | ENF              | Blanken et al. (2016)           |
| US-Oho    | -83.8438         | 41.5545          | 214              | 2004       | 2013     | DBF              | Chen and Noormets (2016)        |
| US-PFa    | -90.2723         | 45.9459          | 474              | 1996       | 2014     | MF               | Desai (2016a)                   |
| US-Prr    | -147.4876        | 65.12367         | 264              | 2011       | 2014     | ENF              | Kobayashi and Suzuki (2016)     |
| US-SRC    | -110.8395        | 31.9083          | 1004             | 2008       | 2014     | MF               | Kurc (2016)                     |
| US-SRG    | -110.8277        | 31.78938         | 1293             | 2008       | 2014     | GRA              | Scott (2016a)                   |
| US-SRM    | -110.8661        | 31.8214          | 1130             | 2004       | 2014     | WSA              | Scott (2016b)                   |
| US-Sta    | -106.8024        | 41.3966          | 2180             | 2005       | 2009     | OSH              | Ewers and Pendall (2016)        |
| US-Syv    | -89.3477         | 46.242           | 540              | 2001       | 2014     | MF               | Desai (2016b)                   |
| US-Ton    | -120.966         | 38.4316          | 179              | 2001       | 2014     | WSA              | Baldocchi and Ma (2016)         |
| US-Var    | -120.9507        | 38.4133          | 155              | 2000       | 2014     | GRA              | Baldocchi and Xu (2016)         |
| US-WCr    | -90.0799         | 45.8059          | 524              | 1999       | 2014     | DBF              | Desai (2016c)                   |
| US-Whs    | -110.0522        | 31.7438          | 1369             | 2007       | 2014     | OSH              | Scott (2016c)                   |
| US-Wi0    | -91.08144        | 46.61878         | 345              | 2002       | 2005     | ENF              | Chen (2016a)                    |
| US-Wi3    | -91.09867        | 46.63472         | 401              | 2002       | 2004     | DBF              | Chen (2016b)                    |
| US-Wi4    | -91.16625        | 46.73933         | 377              | 2002       | 2005     | ENF              | Chen (2016c)                    |

| Site name | Lon <sup>1</sup> | Lat <sup>2</sup> | Alt <sup>3</sup> | Year start | Year end | Veg <sup>4</sup> | Ref <sup>5</sup>        |
|-----------|------------------|------------------|------------------|------------|----------|------------------|-------------------------|
| US-Wi6    | -91.29822        | 46.62489         | 357              | 2002       | 2003     | OSH              | Chen (2016d)            |
| US-Wkg    | -109.9419        | 31.7365          | 1513             | 2004       | 2014     | GRA              | Scott (2016d)           |
| ZM-Mon    | 23.2525          | -15.4391         | 1086             | 2000       | 2009     | DBF              | Kutsch and Kolle (2016) |

<sup>1</sup> Negative value indicates west longitude. <sup>2</sup> Positive value indicates north latitude. <sup>3</sup> Elevation (m) from Worldclim (Fick and Hijmans, 2017) <sup>4</sup> Vegetation types: deciduous broadleaf forest (DBF); evergreen broadleaf forest (EBF); evergreen needleleaf forest (ENF); grassland (GRA); mixed deciduous and evergreen needleleaf forest (MF); savanna ecosystem (SAV); open shrubland ecosystem (OSH); closed shrubland ecosystem (CSH). <sup>5</sup> References.

## References

- Amiro, B.: FLUXNET2015 CA-SF1 Saskatchewan - Western Boreal, forest burned in 1977, FLUXNET; University of Manitoba, <https://doi.org/10.18140/flx/1440046>, 2016a.
- Amiro, B.: FLUXNET2015 CA-SF2 Saskatchewan - Western Boreal, forest burned in 1989, FLUXNET; University of Manitoba, <https://doi.org/10.18140/flx/1440047>, 2016b.
- Amiro, B.: FLUXNET2015 CA-SF3 Saskatchewan - Western Boreal, forest burned in 1998, FLUXNET; University of Manitoba; Canadian Forest Service, <https://doi.org/10.18140/flx/1440048>, 2016c.
- Ammann, C.: FLUXNET2015 CH-Oe1 Oensingen grassland, FLUXNET; Agroscope Zuerich, <https://doi.org/10.18140/flx/1440135>, 2016.
- Arain, M.: FLUXNET2015 CA-TP1 Ontario - Turkey Point 2002 Plantation White Pine, FLUXNET; McMaster University, <https://doi.org/10.18140/flx/1440050>, 2016a.
- Arain, M.: FLUXNET2015 CA-TP2 Ontario - Turkey Point 1989 Plantation White Pine, FLUXNET; McMaster University, <https://doi.org/10.18140/flx/1440051>, 2016b.
- Arain, M.: FLUXNET2015 CA-TP3 Ontario - Turkey Point 1974 Plantation White Pine, FLUXNET; McMaster University, <https://doi.org/10.18140/flx/1440052>, 2016c.
- Arain, M.: FLUXNET2015 CA-TP4 Ontario - Turkey Point 1939 Plantation White Pine, FLUXNET; McMaster University, <https://doi.org/10.18140/flx/1440053>, 2016d.
- Arain, M.: FLUXNET2015 CA-TPD Ontario - Turkey Point Mature Deciduous, FLUXNET; McMaster University, <https://doi.org/10.18140/flx/1440112>, 2016e.
- Ardö, J., E. T. B. and ElKhidir, H.: FLUXNET2015 SD-Dem Demokeya, FLUXNET; LUND UNIVERSITY, <https://doi.org/10.18140/flx/1440186>, 2016.
- Arndt, S., H.-N. N. and Griebel, A.: FLUXNET2015 AU-Wom Wombat, FLUXNET; University of Melbourne, School of Ecosystem and Forest Sciences, <https://doi.org/10.18140/flx/1440207>, 2016.
- Aurela, M. et al.: FLUXNET2015 FI-Sod Sodankyla, FLUXNET; Finnish Meteorological Institute, <https://doi.org/10.18140/flx/1440160>, 2016.

- Baldocchi, D. and Ma, S.: FLUXNET2015 US-Ton Tonzi Ranch, FLUXNET; University of California, Berkeley, <https://doi.org/10.18140/flx/1440092>, 2016.
- Baldocchi, D., M.-S. and Xu, L.: FLUXNET2015 US-Var Vaira Ranch- Ione, FLUXNET; University of California, Berkeley, <https://doi.org/10.18140/flx/1440094>, 2016.
- Belelli, L., P.-D. and Valentini, R.: FLUXNET2015 RU-Ha1 Hakasia steppe, FLUXNET; University of Tuscia - Vietrbo, <https://doi.org/10.18140/flx/1440184>, 2016.
- Berbigier, P. and Loustau, D.: FLUXNET2015 FR-LBr Le Bray, FLUXNET; INRA - UMR ISPA, <https://doi.org/10.18140/flx/1440163>, 2016.
- Beringer, J., H.-L. M. D. and U, P.: FLUXNET2015 AU-Wac Wallaby Creek, FLUXNET; Monash University; University of California Davis; Charles Darwin University; University of Alaska Fairbanks; University of Melbourne,, <https://doi.org/10.18140/flx/1440127>, 2016.
- Beringer, J. and Hutley, L.: FLUXNET2015 AU-Ade Adelaide River, FLUXNET; Monash University; Charles Darwin University, <https://doi.org/10.18140/flx/1440193>, 2016a.
- Beringer, J. and Hutley, L.: FLUXNET2015 AU-DaP Daly River Savanna, FLUXNET; Monash University; Charles Darwin University, <https://doi.org/10.18140/flx/1440123>, 2016b.
- Beringer, J. and Hutley, L.: FLUXNET2015 AU-Dry Dry River, FLUXNET; Monash University; University of Western Australia; Charles Darwin University, <https://doi.org/10.18140/flx/1440197>, 2016c.
- Beringer, J. and Hutley, L.: FLUXNET2015 AU-How Howard Springs, FLUXNET; Charles Darwin University; University of Western Australia; Monash University, <https://doi.org/10.18140/flx/1440125>, 2016d.
- Beringer, J. and Hutley, L.: FLUXNET2015 AU-RDF Red Dirt Melon Farm, Northern Territory, FLUXNET; Monash University; Charles Darwin University, <https://doi.org/10.18140/flx/1440201>, 2016e.
- Beringer, J. and Hutley, L.: FLUXNET2015 AU-Stp Sturt Plains, FLUXNET; University of Western Australia; Charles Darwin University; Monash University, <https://doi.org/10.18140/flx/1440204>, 2016f.
- Beringer, J. and Hutley, P.: FLUXNET2015 AU-DaS Daly River Cleared, FLUXNET; University of Western Australia; Charles Darwin University; Monash University, <https://doi.org/10.18140/flx/1440122>, 2016g.
- Beringer, J. et al.: FLUXNET2015 AU-Rig Riggs Creek, FLUXNET; Monash University, <https://doi.org/10.18140/flx/1440202>, 2016a.
- Beringer, J. et al.: FLUXNET2015 AU-Whr Whroo, FLUXNET; Monash University, <https://doi.org/10.18140/flx/1440206>, 2016b.
- Bernhofer, C. et al.: FLUXNET2015 DE-Gri Grillenburg, FLUXNET; TU Dresden, <https://doi.org/10.18140/flx/1440147>, 2016a.
- Bernhofer, C. et al.: FLUXNET2015 DE-Obe Oberbärenburg, FLUXNET; TU Dresden, <https://doi.org/10.18140/flx/1440151>, 2016b.
- Bernhofer, C. et al.: FLUXNET2015 DE-Tha Tharandt, FLUXNET; TU Dresden, <https://doi.org/10.18140/flx/1440152>, 2016c.

- Berveiller, D. et al.: FLUXNET2015 FR-Fon Fontainebleau-Barbeau, FLUXNET; CNRS, <https://doi.org/10.18140/flx/1440161>, 2016.
- Billesbach, D., B.-J. and Torn, M.: FLUXNET2015 US-AR1 ARM USDA UNL OSU Woodward Switchgrass 1, Department of Agriculture; University of Nebraska, <https://doi.org/10.18140/flx/1440103>, 2016a.
- Billesbach, D., B.-J. and Torn, M.: FLUXNET2015 US-AR2 ARM USDA UNL OSU Woodward Switchgrass 2, Department of Agriculture; University of Nebraska, <https://doi.org/10.18140/flx/1440104>, 2016b.
- Black, T.: FLUXNET2015 CA-Oas Saskatchewan - Western Boreal, Mature Aspen, FLUXNET; The University of British Columbia, <https://doi.org/10.18140/flx/1440043>, 2016a.
- Black, T.: FLUXNET2015 CA-Obs Saskatchewan - Western Boreal, Mature Black Spruce, FLUXNET; The University of British Columbia, <https://doi.org/10.18140/flx/1440044>, 2016b.
- Blanken, P. et al.: FLUXNET2015 US-NR1 Niwot Ridge Forest (LTER NWT1), FLUXNET; University of Colorado, <https://doi.org/10.18140/flx/1440087>, 2016.
- Bonal, D. and Burban, B.: FLUXNET2015 GF-Guy Guyaflux (French Guiana), FLUXNET; INRA, <https://doi.org/10.18140/flx/1440165>, 2016.
- Bowling, D.: FLUXNET2015 US-Cop Corral Pocket, FLUXNET; University of Utah, <https://doi.org/10.18140/flx/1440100>, 2016.
- Cañete, E. et al.: FLUXNET2015 ES-LJu Llano de los Juanes, FLUXNET; University of Granada, <https://doi.org/10.18140/flx/1440157>, 2016.
- Cescatti, A., M.-B. Z. R. and Gianelle, D.: FLUXNET2015 IT-La2 Lavarone2, FLUXNET; Centro di Ecologia Alpina, <https://doi.org/10.18140/flx/1440235>, 2016.
- Chen, J., C.-H. and Noormets, A.: FLUXNET2015 US-Oho Oak Openings, FLUXNET; University of Toledo/Michigan State University, <https://doi.org/10.18140/flx/1440088>, 2016.
- Chen, J.: FLUXNET2015 US-Wi0 Young red pine (YRP), FLUXNET; Michigan State University, <https://doi.org/10.18140/flx/1440055>, 2016a.
- Chen, J.: FLUXNET2015 US-Wi3 Mature hardwood (MHW), FLUXNET; Michigan State University, <https://doi.org/10.18140/flx/1440057>, 2016b.
- Chen, J.: FLUXNET2015 US-Wi4 Mature red pine (MRP), FLUXNET; Michigan State University, <https://doi.org/10.18140/flx/1440058>, 2016c.
- Chen, J.: FLUXNET2015 US-Wi6 Pine barrens #1 (PB1), FLUXNET; Michigan State University, <https://doi.org/10.18140/flx/1440060>, 2016d.
- Chen, S.: FLUXNET2015 CN-Du2 Duolun\_grassland (D01), FLUXNET; Institute of Botany, Chinese Academy of Sciences, <https://doi.org/10.18140/flx/1440140>, 2016e.
- Cleverly, J. and Eamus, D.: FLUXNET2015 AU-ASM Alice Springs, FLUXNET; University of Technology Sydney, <https://doi.org/10.18140/flx/1440194>, 2016.

- Cremonese, E., G.-M. D. C. U. and Migliavacca, M.: FLUXNET2015 IT-Tor Torgnon, FLUXNET; Environmental Protection Agency of Aosta Valley, <https://doi.org/10.18140/flx/1440237>, 2016.
- De Ligne, A. et al.: FLUXNET2015 BE-Vie Vielsalm, FLUXNET; University of Liege - Gembloux Agro-Bio Tech; University catholic of Louvain-la-Neuve,, <https://doi.org/10.18140/flx/1440130>, 2016.
- Desai, A.: FLUXNET2015 US-PFa Park Falls/WLEF, FLUXNET; University of Wisconsin, <https://doi.org/10.18140/flx/1440089>, 2016a.
- Desai, A.: FLUXNET2015 US-Syv Sylvania Wilderness Area, FLUXNET; University of Wisconsin, <https://doi.org/10.18140/flx/1440091>, 2016b.
- Desai, A.: FLUXNET2015 US-WCr Willow Creek, FLUXNET; University of Wisconsin, <https://doi.org/10.18140/flx/1440095>, 2016c.
- Dolman, H. et al.: FLUXNET2015 NL-Hor Horstermeer, FLUXNET; Vrije Universiteit Amsterdam, <https://doi.org/10.18140/flx/1440177>, 2016a.
- Dolman, H. et al.: FLUXNET2015 RU-Cok Chokurdakh, FLUXNET; Vrije Universiteit Amsterdam, <https://doi.org/10.18140/flx/1440182>, 2016b.
- Dong, G.: FLUXNET2015 CN-Cng Changling, FLUXNET; Shanxi University, <https://doi.org/10.18140/flx/1440209>, 2016.
- Drake, B. and Hinkle, R.: FLUXNET2015 US-KS2 Kennedy Space Center (scrub oak), FLUXNET; Smithsonian Environmental Research Center; University of Central Florida, <https://doi.org/10.18140/flx/1440075>, 2016.
- Ewenz, C., S.-R. and Grigson, G.: FLUXNET2015 AU-Lox Loxton, FLUXNET; South Australian Research and Development Institute (SARDI), <https://doi.org/10.18140/flx/1440247>, 2016.
- Ewers, B. and Pendall, E.: FLUXNET2015 US-Sta Saratoga, FLUXNET; University of Wyoming, <https://doi.org/10.18140/flx/1440115>, 2016.
- Fares, S., S.-F. and Conte, A.: FLUXNET2015 IT-Cp2 Castelporziano 2, FLUXNET; Council for Agricultural Research and Economics, <https://doi.org/10.18140/flx/1440233>, 2016.
- Fick, S. E. and Hijmans, R. J.: WorldClim 2: new 1-km spatial resolution climate surfaces for global land areas, *International Journal of Climatology*, 37, 4302–4315, <https://doi.org/https://doi.org/10.1002/joc.5086>, 2017.
- Garcia, A. et al.: FLUXNET2015 AR-SLu San Luis, FLUXNET; Instituto Nacional de Tecnología Agropecuaria (INTA), <https://doi.org/10.18140/flx/1440191>, 2016.
- Gianelle, D., C.-M. Z. R. and Marcolla, B.: FLUXNET2015 IT-MBo Monte Bondone, FLUXNET; Edmund Mach Foundation, <https://doi.org/10.18140/flx/1440170>, 2016.
- Gianelle, D., Z.-R. C. M. and Sottocornola, M.: FLUXNET2015 IT-Lav Lavarone, FLUXNET; Edmund Mach Foundation, <https://doi.org/10.18140/flx/1440169>, 2016.
- Goldstein, A.: FLUXNET2015 US-Blo Blodgett Forest, FLUXNET; University of California, Berkeley, <https://doi.org/10.18140/flx/1440068>, 2016.

- Goulden, M.: FLUXNET2015 BR-Sa3 Santarem-Km83-Logged Forest, FLUXNET; University of California - Irvine, <https://doi.org/10.18140/flx/1440033>, 2016a.
- Goulden, M.: FLUXNET2015 CA-NS1 UCI-1850 burn site, FLUXNET; University of California - Irvine, <https://doi.org/10.18140/flx/1440036>, 2016b.
- Goulden, M.: FLUXNET2015 CA-NS2 UCI-1930 burn site, FLUXNET; University of California - Irvine, <https://doi.org/10.18140/flx/1440037>, 2016c.
- Goulden, M.: FLUXNET2015 CA-NS3 UCI-1964 burn site, FLUXNET; University of California - Irvine, <https://doi.org/10.18140/flx/1440038>, 2016d.
- Goulden, M.: FLUXNET2015 CA-NS4 UCI-1964 burn site wet, FLUXNET; University of California - Irvine, <https://doi.org/10.18140/flx/1440039>, 2016e.
- Goulden, M.: FLUXNET2015 CA-NS5 UCI-1981 burn site, FLUXNET; University of California - Irvine, <https://doi.org/10.18140/flx/1440040>, 2016f.
- Goulden, M.: FLUXNET2015 CA-NS6 UCI-1989 burn site, FLUXNET; University of California - Irvine, <https://doi.org/10.18140/flx/1440041>, 2016g.
- Goulden, M.: FLUXNET2015 CA-NS7 UCI-1998 burn site, FLUXNET; University of California - Irvine, <https://doi.org/10.18140/flx/1440042>, 2016h.
- Gruening, C. et al.: FLUXNET2015 IT-SRo San Rossore, FLUXNET; European Commission - Joint Research Centre, <https://doi.org/10.18140/flx/1440176>, 2016.
- Gruening, C., G.-I. C. A. and Pokorska, O.: FLUXNET2015 IT-Isp Ispra ABC-IS, FLUXNET; European Commission - Joint Research Centre, <https://doi.org/10.18140/flx/1440234>, 2016a.
- Gruening, C., G.-I. C. A. and Pokorska, O.: FLUXNET2015 IT-SR2 San Rossore 2, FLUXNET; European Commission - Joint Research Centre, <https://doi.org/10.18140/flx/1440236>, 2016b.
- Hörtnagl, L. et al.: FLUXNET2015 CH-Cha Chamau, FLUXNET; ETH Zurich, <https://doi.org/10.18140/flx/1440131>, 2016a.
- Hörtnagl, L. et al.: FLUXNET2015 CH-Dav Davos, FLUXNET; ETH Zurich, <https://doi.org/10.18140/flx/1440132>, 2016b.
- Hörtnagl, L. et al.: FLUXNET2015 CH-Fru Frübüel, FLUXNET; ETH Zurich, <https://doi.org/10.18140/flx/1440133>, 2016c.
- Hörtnagl, L. et al.: FLUXNET2015 CH-Lae Laegern, FLUXNET; ETH Zurich, <https://doi.org/10.18140/flx/1440134>, 2016d.
- Ibrom, A. and Pilegaard, K.: FLUXNET2015 DK-Sor Soroe, FLUXNET; Technical University of Denmark (DTU), <https://doi.org/10.18140/flx/1440155>, 2016.
- Knohl, A. et al.: FLUXNET2015 DE-Hai Hainich, FLUXNET; University of Goettingen, Bioclimatology, <https://doi.org/10.18140/flx/1440148>, 2016a.
- Knohl, A. et al.: FLUXNET2015 DE-Lnf Leinefelde, FLUXNET; University of Goettingen, Bioclimatology, <https://doi.org/10.18140/flx/1440150>, 2016b.

- Kobayashi, H. and Suzuki, R.: FLUXNET2015 US-Prr Poker Flat Research Range Black Spruce Forest, FLUXNET; Japan Agency for Marine-Earth Science and Technology, <https://doi.org/10.18140/flx/1440113>, 2016.
- Kotani, A.: FLUXNET2015 JP-MBF Moshiri Birch Forest Site, FLUXNET; Nagoya University, <https://doi.org/10.18140/flx/1440238>, 2016a.
- Kotani, A.: FLUXNET2015 JP-SMF Seto Mixed Forest Site, FLUXNET; Nagoya University, <https://doi.org/10.18140/flx/1440239>, 2016b.
- Kurc, S.: FLUXNET2015 US-SRC Santa Rita Creosote, FLUXNET; University of Arizona, <https://doi.org/10.18140/flx/1440098>, 2016.
- Kutsch, W., M.-L. and Kolle, O.: FLUXNET2015 ZM-Mon Mongu, FLUXNET; Max-Planck Institute for Biogeochemistry, <https://doi.org/10.18140/flx/1440189>, 2016.
- Law, B.: FLUXNET2015 US-Me1 Metolius - Eyerly burn, FLUXNET; Oregon State University, <https://doi.org/10.18140/flx/1440078>, 2016a.
- Law, B.: FLUXNET2015 US-Me2 Metolius mature ponderosa pine, FLUXNET; Oregon State University, <https://doi.org/10.18140/flx/1440079>, 2016b.
- Law, B.: FLUXNET2015 US-Me3 Metolius-second young aged pine, FLUXNET; Oregon State University, <https://doi.org/10.18140/flx/1440080>, 2016c.
- Law, B.: FLUXNET2015 US-Me4 Metolius-old aged ponderosa pine, FLUXNET; Oregon State University, <https://doi.org/10.18140/flx/1440081>, 2016d.
- Law, B.: FLUXNET2015 US-Me5 Metolius-first young aged pine, FLUXNET; Oregon State University, <https://doi.org/10.18140/flx/1440082>, 2016e.
- Law, B.: FLUXNET2015 US-Me6 Metolius Young Pine Burn, FLUXNET; Oregon State University, <https://doi.org/10.18140/flx/1440099>, 2016f.
- Lindauer, M. et al.: FLUXNET2015 DE-Lkb Lackenberg, FLUXNET; Karlsruhe Institute of Technology, IMK-IFU, <https://doi.org/10.18140/flx/1440214>, 2016.
- Lohila, A. et al.: FLUXNET2015 FI-Let Lettosuo, FLUXNET; Finnish Meteorological Institute, <https://doi.org/10.18140/flx/1440227>, 2016.
- Lund, M., J.-K. M. and Abermann, J.: FLUXNET2015 GL-ZaH Zackenberg Heath, FLUXNET; Aarhus University, <https://doi.org/10.18140/flx/1440224>, 2016.
- Macfarlane, C. et al.: FLUXNET2015 AU-Gin Gingin, FLUXNET; Edith Cowan University (Centre for Ecosystem Management), <https://doi.org/10.18140/flx/1440199>, 2016.
- Macfarlane, C., P.-S. and Wiehl, G.: FLUXNET2015 AU-GWW Great Western Woodlands, Western Australia, Australia, FLUXNET; CSIRO, <https://doi.org/10.18140/flx/1440200>, 2016.
- Mammarella, I. et al.: FLUXNET2015 FI-Hyy Hyytiala, FLUXNET; University of Helsinki, <https://doi.org/10.18140/flx/1440158>, 2016.
- Manca, G. and Goded, I.: FLUXNET2015 IT-PT1 Parco Ticino forest, FLUXNET; European Commission - DG Joint Research Centre, <https://doi.org/10.18140/flx/1440172>, 2016.

- Margolis, H.: FLUXNET2015 CA-Qfo Quebec - Eastern Boreal, Mature Black Spruce, FLUXNET; Université Laval, <https://doi.org/10.18140/flx/1440045>, 2016.
- Massman, B.: FLUXNET2015 US-GBT GLEES Brooklyn Tower, FLUXNET; USDA Forest Service, <https://doi.org/10.18140/flx/1440118>, 2016a.
- Massman, B.: FLUXNET2015 US-GLE GLEES, FLUXNET; USDA Forest Service, <https://doi.org/10.18140/flx/1440069>, 2016b.
- Matamala, R.: FLUXNET2015 US-IB2 Fermi National Accelerator Laboratory- Batavia (Prairie site), FLUXNET; Argonne National Laboratory, <https://doi.org/10.18140/flx/1440072>, 2016.
- Matteucci, G.: FLUXNET2015 IT-Col Collelongo, FLUXNET; Istituto di Ecologia e Idrologia Forestale CNR, <https://doi.org/10.18140/flx/1440167>, 2016.
- McCaughey, H.: FLUXNET2015 CA-Gro Ontario - Groundhog River, Boreal Mixedwood Forest, FLUXNET; Queen's University, <https://doi.org/10.18140/flx/1440034>, 2016.
- Meyer, W. et al.: FLUXNET2015 AU-Cpr Calperum, FLUXNET; University of Adelaide, <https://doi.org/10.18140/flx/1440195>, 2016.
- Meyers, T.: FLUXNET2015 US-Goo Goodwin Creek, FLUXNET; NOAA/ARL, <https://doi.org/10.18140/flx/1440070>, 2016a.
- Meyers, T.: FLUXNET2015 US-LWW Little Washita Watershed, FLUXNET; NOAA/ARL, <https://doi.org/10.18140/flx/1440077>, 2016b.
- Montagnani, L. and Minerbi, S.: FLUXNET2015 IT-Ren Renon, FLUXNET; Autonomous Province of Bolzano, Forest Services, <https://doi.org/10.18140/flx/1440173>, 2016.
- Moors, E. and Elbers, J.: FLUXNET2015 NL-Loo Loobos, FLUXNET; AL-TERRA/Wageningen Environmental Research, <https://doi.org/10.18140/flx/1440178>, 2016.
- Munger, J.: FLUXNET2015 US-Ha1 Harvard Forest EMS Tower (HFR1), FLUXNET; Harvard University, <https://doi.org/10.18140/flx/1440071>, 2016.
- Neirynek, J. et al.: FLUXNET2015 BE-Bra Brasschaat, FLUXNET; University of Antwerp, <https://doi.org/10.18140/flx/1440128>, 2016.
- Nouvellon, Y.: FLUXNET2015 CG-Tch Tchizalamou, FLUXNET; Centre de coopération internationale en recherche agronomique pour le développement, <https://doi.org/10.18140/flx/1440142>, 2016.
- Novick, K. and Phillips, R.: FLUXNET2015 US-MMS Morgan Monroe State Forest, FLUXNET; Indiana University, <https://doi.org/10.18140/flx/1440083>, 2016.
- Ourcival, J.: FLUXNET2015 FR-Pue Puechabon, FLUXNET; CNRS, <https://doi.org/10.18140/flx/1440164>, 2016.
- Papale, D. et al.: FLUXNET2015 IT-Ro2 Roccarespampani 2, FLUXNET; University of Tuscia - Vietrbo, <https://doi.org/10.18140/flx/1440175>, 2016.

Pastorello, G., Trotta, C., Canfora, E., Chu, H., Christianson, D., Cheah, Y.-W., Poindexter, C., Chen, J., Elbashandy, A., Humphrey, M., Isaac, P., Polidori, D., Reichstein, M., Ribeca, A., van Ingen, C., Vuichard, N., Zhang, L., Amiro, B., Ammann, C., Arain, M. A., Ardö, J., Arkebauer, T., Arndt, S. K., Arriga, N., Aubinet, M., Aurela, M., Baldocchi, D., Barr, A., Beamesderfer, E., Marchesini, L. B., Bergeron, O., Beringer, J., Bernhofer, C., Berveiller, D., Billesbach, D., Black, T. A., Blanken, P. D., Bohrer, G., Boike, J., Bolstad, P. V., Bonal, D., Bonnefond, J.-M., Bowling, D. R., Bracho, R., Brodeur, J., Brümmer, C., Buchmann, N., Burban, B., Burns, S. P., Buysse, P., Cale, P., Cavagna, M., Cellier, P., Chen, S., Chini, I., Christensen, T. R., Cleverly, J., Collalti, A., Consalvo, C., Cook, B. D., Cook, D., Coursolle, C., Cremonese, E., Curtis, P. S., D'Andrea, E., da Rocha, H., Dai, X., Davis, K. J., Cinti, B. D., Grandcourt, A. d., Ligne, A. D., De Oliveira, R. C., Delpierre, N., Desai, A. R., Di Bella, C. M., Tommasi, P. d., Dolman, H., Domingo, F., Dong, G., Dore, S., Duce, P., Dufrêne, E., Dunn, A., Dušek, J., Eamus, D., Eichelmann, U., ElKhidir, H. A. M., Eugster, W., Ewenz, C. M., Ewers, B., Famulari, D., Fares, S., Feigenwinter, I., Feitz, A., Fensholt, R., Filippa, G., Fischer, M., Frank, J., Galvagno, M., Gharun, M., Gianelle, D., Gielen, B., Gioli, B., Gitelson, A., Goded, I., Goeckede, M., Goldstein, A. H., Gough, C. M., Goulden, M. L., Graf, A., Griebel, A., Gruening, C., Grünwald, T., Hammerle, A., Han, S., Han, X., Hansen, B. U., Hanson, C., Hatakka, J., He, Y., Hehn, M., Heinesch, B., Hinko-Najera, N., Hörtnagl, L., Hutley, L., Ibrom, A., Ikawa, H., Jackowicz-Korczynski, M., Janouš, D., Jans, W., Jassal, R., Jiang, S., Kato, T., Khomik, M., Klatt, J., Knohl, A., Knox, S., Kobayashi, H., Koerber, G., Kolle, O., Kosugi, Y., Kotani, A., Kowalski, A., Kruijt, B., Kurbatova, J., Kutsch, W. L., Kwon, H., Launiainen, S., Laurila, T., Law, B., Leuning, R., Li, Y., Liddell, M., Limousin, J.-M., Lion, M., Liska, A. J., Lohila, A., López-Ballesteros, A., López-Blanco, E., Loubet, B., Loustau, D., Lucas-Moffat, A., Lüers, J., Ma, S., Macfarlane, C., Magliulo, V., Maier, R., Mammarella, I., Manca, G., Marcolla, B., Margolis, H. A., Marras, S., Massman, W., Mastepanov, M., Matamala, R., Matthes, J. H., Mazzenga, F., McCaughey, H., McHugh, I., McMillan, A. M. S., Merbold, L., Meyer, W., Meyers, T., Miller, S. D., Minerbi, S., Moderow, U., Monson, R. K., Montagnani, L., Moore, C. E., Moors, E., Moreaux, V., Moureaux, C., Munger, J. W., Nakai, T., Neiryneck, J., Nesic, Z., Nicolini, G., Noormets, A., Northwood, M., Nosetto, M., Nouvellon, Y., Novick, K., Oechel, W., Olesen, J. E., Ourcival, J.-M., Papuga, S. A., Parmentier, F.-J., Paul-Limoges, E., Pavelka, M., Peichl, M., Pendall, E., Phillips, R. P., Pilegaard, K., Pirk, N., Posse, G., Powell, T., Prasse, H., Prober, S. M., Rambal, S., Rannik, Ü., Raz-Yaseef, N., Rebmann, C., Reed, D., Dios, V. R. d., Restrepo-Coupe, N., Reverter, B. R., Roland, M., Sabbatini, S., Sachs, T., Saleska, S. R., Sánchez-Cañete, E. P., Sanchez-Mejia, Z. M., Schmid, H. P., Schmidt, M., Schneider, K., Schrader, F., Schroder, I., Scott, R. L., Sedláč, P., Serrano-Ortíz, P., Shao, C., Shi, P., Shironya, I., Siebicke, L., Šigut, L., Silberstein, R., Sirca, C., Spano, D., Steinbrecher, R., Stevens, R. M., Sturtevant, C., Suyker, A., Tagesson, T., Takanashi, S., Tang, Y., Tapper, N., Thom, J., Tomassucci, M., Tuovinen, J.-P., Urbanski, S., Valentini, R., van der Molen, M., van Gorsel, E., van Huissteden, K., Varlagin, A., Verfaillie, J., Vesala, T., Vincke, C., Vitale, D., Vygodskaya, N., Walker, J. P., Walter-Shea, E., Wang, H., Weber, R., Westermann, S., Wille, C., Wofsy, S., Wohlfahrt, G., Wolf, S., Woodgate, W., Li, Y., Zampedri, R., Zhang, J., Zhou, G., Zona, D., Agarwal, D., Biraud, S., Torn, M., and Papale, D.: The FLUXNET2015 dataset and the ONEFlux processing pipeline for eddy covariance data, 7, 225, <https://doi.org/10.1038/s41597-020-0534-3>, publisher: Nature Publishing Group, 2020.

Pendall, E. and Griebel, A.: FLUXNET2015 AU-Cum Cumberland Plains, FLUXNET; Western Sydney University, <https://doi.org/10.18140/flx/1440196>, 2016.

Pilegaard, K. and Ibrom, A.: FLUXNET2015 DK-Eng Enghave, FLUXNET; Technical University of Denmark (DTU), <https://doi.org/10.18140/flx/1440153>, 2016.

- Posse, G., L. N. R. K. and Cristiano, P.: FLUXNET2015 AR-Vir Virasoro, FLUXNET; Instituto Nacional de Tecnología Agropecuaria, <https://doi.org/10.18140/flx/1440192>, 2016.
- Poveda, F. et al.: FLUXNET2015 ES-Amo Amoladeras, FLUXNET; Estación Experimental de Zona Áridas (EEZA, CSIC), <https://doi.org/10.18140/flx/1440156>, 2016.
- Reverter, B., P.-C. E. and Kowalski, A.: FLUXNET2015 ES-LgS Laguna Seca, FLUXNET; Universidad de Granada, <https://doi.org/10.18140/flx/1440225>, 2016.
- Sabbatini, S., A.-N. and Papale, D.: FLUXNET2015 IT-CA1 Castel d'Asso1, FLUXNET; University of Tuscia - Vietrbo, <https://doi.org/10.18140/flx/1440230>, 2016a.
- Sabbatini, S., A.-N. M. G. and Papale, D.: FLUXNET2015 IT-CA3 Castel d'Asso 3, FLUXNET; University of Tuscia - Vietrbo; CNR IBAF, <https://doi.org/10.18140/flx/1440232>, 2016b.
- Saleska, S.: FLUXNET2015 BR-Sa1 Santarem-Km67-Primary Forest, FLUXNET; University of Arizona, <https://doi.org/10.18140/flx/1440032>, 2016.
- Schroder, I., Z.-S. P. T. and Feitz, A.: FLUXNET2015 AU-Emr Emerald, FLUXNET; CSIRO; Geoscience Australia, <https://doi.org/10.18140/flx/1440198>, 2016.
- Scott, R.: FLUXNET2015 US-SRG Santa Rita Grassland, FLUXNET; United States Department of Agriculture, <https://doi.org/10.18140/flx/1440114>, 2016a.
- Scott, R.: FLUXNET2015 US-SRM Santa Rita Mesquite, FLUXNET; United States Department of Agriculture, <https://doi.org/10.18140/flx/1440090>, 2016b.
- Scott, R.: FLUXNET2015 US-Whs Walnut Gulch Lucky Hills Shrub, FLUXNET; United States Department of Agriculture, <https://doi.org/10.18140/flx/1440097>, 2016c.
- Scott, R.: FLUXNET2015 US-Wkg Walnut Gulch Kendall Grasslands, FLUXNET; United States Department of Agriculture, <https://doi.org/10.18140/flx/1440096>, 2016d.
- Shi, P., Z.-X. and He, Y.: FLUXNET2015 CN-Dan Dangxiong, FLUXNET; IGSNRR Chinese Academy of Sciences, <https://doi.org/10.18140/flx/1440138>, 2016.
- Sigut, L. et al.: FLUXNET2015 CZ-BK1 Bily Kriz forest, FLUXNET; Global Change Research Institute CAS, <https://doi.org/10.18140/flx/1440143>, 2016a.
- Sigut, L. et al.: FLUXNET2015 CZ-BK2 Bily Kriz grassland, FLUXNET; Global Change Research Institute CAS, <https://doi.org/10.18140/flx/1440144>, 2016b.
- Spano, D. et al.: FLUXNET2015 IT-Noe Arca di Noe - Le Prigionette, FLUXNET; University of Sassari; CNR-Ibimet Sassari, <https://doi.org/10.18140/flx/1440171>, 2016.
- Tagesson, T., A.-J. and Fensholt, R.: FLUXNET2015 SN-Dhr Dahra, FLUXNET; Lund University, <https://doi.org/10.18140/flx/1440246>, 2016.
- Tang, Y., K.-T. and Du, M.: FLUXNET2015 CN-HaM Haibei Alpine Tibet site, FLUXNET; National Institute for Environmental Studies, <https://doi.org/10.18140/flx/1440190>, 2016.
- Torn, M.: FLUXNET2015 US-ARb ARM Southern Great Plains burn site- Lamont, FLUXNET; Lawrence Berkeley National Laboratory, <https://doi.org/10.18140/flx/1440064>, 2016a.

- Torn, M.: FLUXNET2015 US-ARc ARM Southern Great Plains control site- Lamont, FLUXNET; Lawrence Berkeley National Laboratory, <https://doi.org/10.18140/flx/1440065>, 2016b.
- Valentini, R. et al.: FLUXNET2015 GH-Ank Ankasa, FLUXNET; Euro Mediterranean Center for Climate Change - Viterbo; University of Tuscia - Vietrbo., <https://doi.org/10.18140/flx/1440229>, 2016a.
- Valentini, R. et al.: FLUXNET2015 IT-Cpz Castelporziano, FLUXNET; University of Tuscia - Vietrbo, <https://doi.org/10.18140/flx/1440168>, 2016b.
- Valentini, R. et al.: FLUXNET2015 IT-Ro1 Roccarespampani 1, FLUXNET; University of Tuscia - Vietrbo, <https://doi.org/10.18140/flx/1440174>, 2016c.
- Varlagin, A., K.-J. and Vygodskaya, N.: FLUXNET2015 RU-Fyo Fyodorovskoye, Severtsov Institute of Ecology and Evolution, <https://doi.org/10.18140/flx/1440183>, 2016.
- Wang, H. and Fu, X.: FLUXNET2015 CN-Qia Qianyanzhou, FLUXNET; IGSNRR Chinese Academy of Sciences, <https://doi.org/10.18140/flx/1440141>, 2016.
- Wohlfahrt, G., H.-A. and Hörtnagl, L.: FLUXNET2015 AT-Neu Neustift, FLUXNET; University of Innsbruck, <https://doi.org/10.18140/flx/1440121>, 2016.
- Wolf, S., E.-W. and Buchmann, N.: FLUXNET2015 PA-SPn Sardinilla Plantation, FLUXNET; ETH Zurich, <https://doi.org/10.18140/flx/1440180>, 2016a.
- Wolf, S., E.-W. and Buchmann, N.: FLUXNET2015 PA-SPs Sardinilla-Pasture, FLUXNET; ETH Zurich, <https://doi.org/10.18140/flx/1440179>, 2016b.
- Woodgate, W., V. G. E. and Leuning, R.: FLUXNET2015 AU-Tum Tumbarumba, FLUXNET; CSIRO, <https://doi.org/10.18140/flx/1440126>, 2016.
- Zhang, J. and Han, S.: FLUXNET2015 CN-Cha Changbaishan, FLUXNET; IAE Chinese Academy of Sciences, <https://doi.org/10.18140/flx/1440137>, 2016.
- Zhou, G. and Yan, J.: FLUXNET2015 CN-Din Dinghushan, FLUXNET; SCIB Chinese Academy of Sciences, <https://doi.org/10.18140/flx/1440139>, 2016.
